# Supplementary material
Source: PubMed Central journal article supplement (PMC4079543)
Supplement: NIHMS587112-supplement-2.pdf [file NIHMS587112-supplement-2.pdf]

**Table S1:** Sample information on the 18 soils used in this study. A cross (†) indicates no 16S rRNA sequence data was retrieved for the specified sample while an asterisk (\*) means functional libraries were too small to be considered in cross-soil comparisons of ARG content. The soil identifier refers to the soil names used in ref. 8.

| Site                       | Sample Name | Soil Identifier | Soil Type    | Added N (kg ha <sup>-1</sup> y <sup>-1</sup> ) | pH  | C:N ratio | Total Organic C (mg / g soil <sup>-1</sup> ) | Total N (mg / g soil <sup>-1</sup> ) | Extractable N (mg kg soil <sup>-1</sup> ) |
|----------------------------|-------------|-----------------|--------------|------------------------------------------------|-----|-----------|----------------------------------------------|--------------------------------------|-------------------------------------------|
| Cedar Creek                | S04         | CC A22          | Grassland    | 0                                              | 7.3 | 14.2      | 16.8                                         | 1.2                                  | 0.8                                       |
| Cedar Creek                | S05         | CC A45          | Grassland    | 0                                              | 7.2 | 13.3      | 12.1                                         | 0.9                                  | 0.6                                       |
| Cedar Creek                | S06         | CC A54          | Grassland    | 0                                              | 7.2 | 13.0      | 18.5                                         | 1.4                                  | 0.6                                       |
| Cedar Creek                | S07         | CC D08          | Grassland    | 34                                             | 6.8 | 13.4      | 17.2                                         | 1.3                                  | 1.3                                       |
| Cedar Creek                | S08†        | CC D23          | Grassland    | 34                                             | 6.9 | 13.2      | 15.5                                         | 1.2                                  | 1.6                                       |
| Cedar Creek                | S09         | CC D38          | Grassland    | 34                                             | 7.0 | 13.2      | 21.6                                         | 1.6                                  | 1.0                                       |
| Cedar Creek                | S10         | CC H17          | Grassland    | 272                                            | 6.1 | 3.3       | 15.0                                         | 1.5                                  | 10.3                                      |
| Cedar Creek                | S11         | CC H40          | Grassland    | 272                                            | 6.1 | 11.5      | 22.5                                         | 2.0                                  | 12.4                                      |
| Cedar Creek                | S12         | CC H52          | Grassland    | 272                                            | 6.0 | 11.0      | 16.6                                         | 1.4                                  | 12.0                                      |
| Kellogg Biological Station | S13         | KBS 201         | Agricultural | 0                                              | 6.1 | 10.3      | 13.1                                         | 1.3                                  | 0.4                                       |
| Kellogg Biological Station | S14         | KBS 204         | Agricultural | 101                                            | 6.5 | 10.8      | 13.9                                         | 1.3                                  | 0.7                                       |
| Kellogg Biological Station | S15         | KBS 209         | Agricultural | 291                                            | 5.5 | 9.4       | 12.0                                         | 1.3                                  | 15.5                                      |
| Kellogg Biological Station | S16         | KBS 301         | Agricultural | 0                                              | 6.6 | 11.4      | 14.8                                         | 1.3                                  | 0.7                                       |
| Kellogg Biological Station | S17         | KBS 304         | Agricultural | 101                                            | 6.1 | 10.7      | 16.9                                         | 1.6                                  | 0.7                                       |
| Kellogg Biological Station | S18*        | KBS 309         | Agricultural | 291                                            | 5.0 | 9.5       | 17.0                                         | 1.8                                  | 18.7                                      |
| Kellogg Biological Station | S19         | KBS 401         | Agricultural | 0                                              | 6.2 | 11.4      | 14.0                                         | 1.2                                  | 0.9                                       |
| Kellogg Biological Station | S20         | KBS 404         | Agricultural | 101                                            | 6.0 | 11.4      | 16.8                                         | 1.5                                  | 1.3                                       |
| Kellogg Biological Station | S21*        | KBS 409         | Agricultural | 291                                            | 5.1 | 9.9       | 13.0                                         | 1.3                                  | 16.0                                      |

**Table S2:** Catalog of the 18 antibiotics used in functional selections for drug resistance from 18 U.S. soils.

| <b>Antibiotic</b>             | <b>Code</b> | <b>Selection Concentration (µg/ml)</b> | <b>Antibiotic Class</b>    | <b>Antibiotic Type</b> |
|-------------------------------|-------------|----------------------------------------|----------------------------|------------------------|
| Aztreonam                     | AZ          | 8                                      | B-lactam                   | Synthetic              |
| Chloramphenicol               | CH          | 8                                      | Amphenicol                 | Natural                |
| Ciprofloxacin                 | CI          | 0.5                                    | Fluoroquinolone            | Synthetic              |
| Colistin                      | CL          | 8                                      | Polymyxin                  | Natural                |
| Cefepime                      | CP          | 8                                      | β-lactam                   | Semi-Synthetic         |
| Cefotaxime                    | CT          | 8                                      | β-lactam                   | Semi-Synthetic         |
| Cefoxitin                     | CX          | 64                                     | β-lactam                   | Semi-Synthetic         |
| D-Cycloserine                 | CY          | 32                                     | Amino Acid Derivative      | Natural                |
| Ceftazidime                   | CZ          | 16                                     | β-lactam                   | Semi-Synthetic         |
| Gentamicin                    | GE          | 16                                     | Aminoglycoside             | Natural                |
| Meropenem                     | ME          | 16                                     | β-lactam                   | Semi-Synthetic         |
| Penicillin                    | PE          | 128                                    | β-lactam                   | Natural                |
| Piperacillin                  | PI          | 16                                     | β-lactam                   | Semi-Synthetic         |
| Piperacillin-Tazobactam       | PI-TZ       | 16-PI/4-TZ                             | β-lactam                   | Semi-Synthetic         |
| Tetracycline                  | TE          | 8                                      | Tetracycline               | Natural                |
| Tigecycline                   | TG          | 2                                      | Tetracycline               | Semi-Synthetic         |
| Trimethoprim                  | TR          | 8                                      | Folate Synthesis Inhibitor | Synthetic              |
| Trimethoprim-Sulfamethoxazole | TR-SX       | 2-TR/38-SX                             | Folate Synthesis Inhibitor | Synthetic              |

**Table S3:** Tests for association of ARG mechanism with bacterial phyla for all comparisons with at least one ARG (those depicted in figure 2B). Significant ( $\alpha < 0.05$ , Fisher's exact test) relationships after Bonferroni correction for 45 hypotheses are indicated in bold and sorted by ARG function and two-tailed p-value. The third column denotes whether an ARG mechanism is enriched or depleted in the indicated phylum. N.S. Not significant.

| <b>ARG Mechanism</b>                | <b>Bacterial Phylum</b> | <b>Enriched/Depleted?</b> | <b>2-tailed p-value</b> | <b>Adj. p-value</b> |
|-------------------------------------|-------------------------|---------------------------|-------------------------|---------------------|
| <b>MFS_Transporter</b>              | <b>Actinobacteria</b>   | <b>Enriched</b>           | <b>5.39E-08</b>         | <b>2.42595E-06</b>  |
| <b>MFS_Transporter</b>              | <b>Acidobacteria</b>    | <b>Depleted</b>           | <b>1.57E-05</b>         | <b>0.0007</b>       |
| <b>MFS_Transporter</b>              | <b>unknown phylum</b>   | <b>Depleted</b>           | <b>3.10E-05</b>         | <b>0.0014</b>       |
| <b>MFS_Transporter</b>              | <b>Proteobacteria</b>   | <b>Enriched</b>           | <b>0.0004</b>           | <b>0.018</b>        |
| MFS_Transporter                     | Bacteroidetes           | Neither                   | 0.0016                  | 0.072               |
| MFS_Transporter                     | Firmicutes              | Neither                   | 0.4692                  | N.S.                |
| <b><math>\beta</math>-lactamase</b> | <b>Verrucomicrobia</b>  | <b>Enriched</b>           | <b>1.08E-07</b>         | <b>4.878E-06</b>    |
| <b><math>\beta</math>-lactamase</b> | <b>Actinobacteria</b>   | <b>Depleted</b>           | <b>6.01E-06</b>         | <b>0.0003</b>       |
| <b><math>\beta</math>-lactamase</b> | <b>Acidobacteria</b>    | <b>Enriched</b>           | <b>1.89E-05</b>         | <b>0.0008</b>       |
| <b><math>\beta</math>-lactamase</b> | <b>Cyanobacteria</b>    | <b>Enriched</b>           | <b>2.76E-05</b>         | <b>0.0012</b>       |
| $\beta$ -lactamase                  | Firmicutes              | Neither                   | 0.0112                  | N.S.                |
| $\beta$ -lactamase                  | unknown phylum          | Neither                   | 0.0316                  | N.S.                |
| $\beta$ -lactamase                  | Proteobacteria          | Neither                   | 0.0612                  | N.S.                |
| $\beta$ -lactamase                  | Bacteroidetes           | Neither                   | 0.0954                  | N.S.                |
| ABC_Transporter                     | Firmicutes              | Neither                   | 0.0298                  | N.S.                |
| ABC_Transporter                     | unknown phylum          | Neither                   | 0.1052                  | N.S.                |
| ABC_Transporter                     | Proteobacteria          | Neither                   | 0.2622                  | N.S.                |
| ABC_Transporter                     | Bacteroidetes           | Neither                   | 0.4794                  | N.S.                |
| ABC_Transporter                     | Actinobacteria          | Neither                   | 0.5046                  | N.S.                |
| ABC_Transporter                     | Verrucomicrobia         | Neither                   | 0.5170                  | N.S.                |
| ABC_Transporter                     | Acidobacteria           | Neither                   | 0.9570                  | N.S.                |
| Acetyltransferase                   | Proteobacteria          | Neither                   | 0.0808                  | N.S.                |
| Acetyltransferase                   | Firmicutes              | Neither                   | 0.1094                  | N.S.                |
| Acetyltransferase                   | Verrucomicrobia         | Neither                   | 0.2190                  | N.S.                |
| Acetyltransferase                   | unknown phylum          | Neither                   | 0.2866                  | N.S.                |
| Acetyltransferase                   | Acidobacteria           | Neither                   | 0.3048                  | N.S.                |
| Acetyltransferase                   | Actinobacteria          | Neither                   | 0.8146                  | N.S.                |
| Acetyltransferase                   | Bacteroidetes           | Neither                   | 0.9990                  | N.S.                |
| Methyltransferase                   | Proteobacteria          | Neither                   | 0.0202                  | N.S.                |
| Methyltransferase                   | Firmicutes              | Neither                   | 0.7906                  | N.S.                |
| Methyltransferase                   | Bacteroidetes           | Neither                   | 0.8176                  | N.S.                |
| Methyltransferase                   | Actinobacteria          | Neither                   | 0.9356                  | N.S.                |
| Other_ARG                           | Firmicutes              | Neither                   | 0.0034                  | N.S.                |
| Other_ARG                           | Actinobacteria          | Neither                   | 0.0196                  | N.S.                |
| Other_ARG                           | unknown phylum          | Neither                   | 0.1646                  | N.S.                |
| Other_ARG                           | Acidobacteria           | Neither                   | 0.4192                  | N.S.                |
| Other_ARG                           | Verrucomicrobia         | Neither                   | 0.5694                  | N.S.                |
| Other_ARG                           | Bacteroidetes           | Neither                   | 0.7994                  | N.S.                |
| Other_ARG                           | Proteobacteria          | Neither                   | 0.8158                  | N.S.                |
| Other_ARG                           | Cyanobacteria           | Neither                   | 0.9482                  | N.S.                |
| Phosphotransferase                  | Cyanobacteria           | Neither                   | 0.0720                  | N.S.                |
| Phosphotransferase                  | Actinobacteria          | Neither                   | 0.1198                  | N.S.                |
| Phosphotransferase                  | Acidobacteria           | Neither                   | 0.3768                  | N.S.                |
| Phosphotransferase                  | unknown phylum          | Neither                   | 0.5836                  | N.S.                |
| Phosphotransferase                  | Proteobacteria          | Neither                   | 0.8018                  | N.S.                |

**Table S4:** Resistance Gene families that most significantly differ between CC and KBS soils. Categories listed are those with unadjusted p-values (Wilcoxon rank sum test) below 0.05; all were elevated in CC soils. Two-tailed p-values are provided in the penultimate column and adjusted for 51 hypotheses via the Bonferroni method (final column). No individual resistance category retains statistical significance after adjustment (although multiple summed categories are robust to the correction). Rather, individual ARG categories are listed to highlight the specific ARGs that most strongly discriminate between CC and KBS soils.

| Resistance Category ID | Annotation                                        | p-value | Adj. p-value |
|------------------------|---------------------------------------------------|---------|--------------|
| All ARGs               | Summed Counts for all ARG Categories              | 0.0002  | 0.0089       |
| $\beta$ -lactamase     | Summed Counts for all $\beta$ -lactamase families | 0.0002  | 0.0089       |
| MFS Transporters       | Summed Counts for all MFS families                | 0.0012  | 0.0624       |
| TIGR00710              | Bcr Efflux Pump                                   | 0.0021  | N.S.         |
| ClassD                 | Class D $\beta$ -lactamase                        | 0.0033  | N.S.         |
| ABC Transporters       | Summed Counts for all ABC families                | 0.0042  | N.S.         |
| SubclassB3             | Subclass B3 $\beta$ -lactamase                    | 0.0052  | N.S.         |
| PF07690.11             | Major Facilitator Superfamily                     | 0.0052  | N.S.         |
| PF01061.19             | ABC-2 type transporter                            | 0.0065  | N.S.         |
| ClassA                 | Class A $\beta$ -lactamase                        | 0.0115  | N.S.         |
| TIGR01188              | drrA, ABC resistance transporter                  | 0.0122  | N.S.         |
| L1                     | L1 (subclass B3) $\beta$ -lactamase               | 0.0225  | N.S.         |
| PF00905.17             | Penicillin binding protein transpeptidase domain  | 0.0225  | N.S.         |
| VEB-PER                | VEB/PER (class A) $\beta$ -lactamase              | 0.0376  | N.S.         |
| TIGR00711              | EmrB: drug resistance MFS transporter             | 0.0412  | N.S.         |

**Table S5:** ARGs shared across at least two soils. An ARG was considered shared if at least two sequences from two soils contained  $\geq 99\%$  nucleotide identity. Of the 23 ARGs shared across soils, 21 were shared within CC soils, a significant enrichment over observations from KBS ( $p < 0.05$ , Fisher's exact test). ARG names take the convention: Soil\_Antibiotic\_ContigNumber\_Start\_Stop.

| ARG 1                | ARG 2              | ARG 3             | ARG 4              | ARG Mechanism      | Soil Site |
|----------------------|--------------------|-------------------|--------------------|--------------------|-----------|
| S04_CZ_11_915_1820   | S05_CH_3_188_553   |                   |                    | $\beta$ -lactamase | CC        |
| S04_AZ_10_1449_2267  | S05_AZ_3_1007_1825 |                   |                    | $\beta$ -lactamase | CC        |
| S05_PI_43_57_872     | S04_PITZ_1_55_870  | S05_AZ_7_2_763    |                    | $\beta$ -lactamase | CC        |
| S05_PE_125_1138_2253 | S09_PE_23_3_587    |                   |                    | $\beta$ -lactamase | CC        |
| S06_TG_5_48_1226     | S07_TG_5_227_1465  | S06_TE_10_48_1226 | S07_TE_13_223_1461 | MFS Transporter    | CC        |
| S06_TG_4_158_1618    | S08_TG_1_895_2355  |                   |                    | MFS Transporter    | CC        |
| S07_TE_21_681_1403   | S09_TE_27_78_1352  |                   |                    | MFS Transporter    | CC        |
| S10_CX_11_1_840      | S11_CT_3_97_1110   |                   |                    | $\beta$ -lactamase | CC        |
| S10_CZ_5_324_1259    | S11_CZ_4_340_1275  |                   |                    | $\beta$ -lactamase | CC        |
| S15_CH_4_3_449       | S21_CH_6_718_1983  |                   |                    | MFS Transporter    | KBS       |

**Table S6:** Resistance Gene families that most significantly differ between high-N and other CC soils. Categories listed are those with unadjusted p-values (Wilcoxon rank sum test) below 0.05. Two-tailed values are provided in the penultimate column and the group in which the ARG is elevated indicated in the final column. No resistance category retains statistical significance after multiple hypothesis correction; rather, ARG categories are listed to highlight the functions that most strongly discriminate between high-N and other CC soils.

| <b>Resistance Category ID</b> | <b>Annotation</b>                                 | <b>p-value</b> | <b>Elevated In:</b> |
|-------------------------------|---------------------------------------------------|----------------|---------------------|
| $\beta$ -lactamase            | Summed Counts for all $\beta$ -lactamase families | 0.0238         | Other CC Soils      |
| ClassD                        | Class D $\beta$ -lactamase                        | 0.0238         | Other CC Soils      |
| PF00005.22                    | ABC Transporter                                   | 0.0275         | High-N CC Soils     |
| SubclassB3                    | Subclass B3 $\beta$ -lactamase                    | 0.0476         | Other CC Soils      |

**Table S7:** Significant Spearman correlations between Bray-Curtis distance matrices calculated from normalized ARG counts and phylogenetic/taxonomic distance matrices generated from 16S rRNA gene sequence. Significant correlations were observed within CC soils, and across the combined set of CC and KBS soils. No significant trend was observed for solely KBS soils.

| Soil Resistomes Considered | Phylogenetic/Taxonomic 16S Metric | Spearman's rho ( $\rho$ ) | p-value |
|----------------------------|-----------------------------------|---------------------------|---------|
| All Soils                  | Unweighted Unifrac                | 0.35                      | 0.0074  |
| All Soils                  | Weighted Unifrac                  | 0.22                      | 0.0447  |
| All Soils                  | Bray-Curtis                       | 0.27                      | 0.0265  |
| CC Soils                   | Unweighted Unifrac                | 0.59                      | 0.0052  |
| CC Soils                   | Weighted Unifrac                  | 0.42                      | 0.0303  |
| CC Soils                   | Bray-Curtis                       | 0.44                      | 0.032   |

**Table S8:**  $M^2$  and p-values associated with Procrustes transformations. When all soils or only CC soils are considered, a significant association between resistome content and soil bacterial composition is observed, independent of whether phylogenetic (unweighted/weighted Unifrac) or taxonomic (Bray-Curtis) measures of 16S community structure are used. Significance is robust to transformations across either the first two or all principal coordinates.

| Soils Considered | 16S Metric         | # Principal Coordinates Transformed | $M^2$ | p-Value |
|------------------|--------------------|-------------------------------------|-------|---------|
| All Soils        | Bray Curtis        | 2                                   | 0.388 | <0.0001 |
| All Soils        | Bray Curtis        | 15                                  | 0.179 | 0.0003  |
| All Soils        | Unweighted Unifrac | 2                                   | 0.362 | <0.0001 |
| All Soils        | Unweighted Unifrac | 15                                  | 0.184 | <0.0001 |
| All Soils        | Weighted Unifrac   | 2                                   | 0.474 | 0.0001  |
| All Soils        | Weighted Unifrac   | 15                                  | 0.273 | 0.0007  |
| Cedar Creek      | Bray Curtis        | 2                                   | 0.227 | 0.0028  |
| Cedar Creek      | Bray Curtis        | 8                                   | 0.072 | 0.0049  |
| Cedar Creek      | Unweighted Unifrac | 2                                   | 0.236 | 0.0018  |
| Cedar Creek      | Unweighted Unifrac | 8                                   | 0.049 | 0.0014  |
| Cedar Creek      | Weighted Unifrac   | 2                                   | 0.299 | 0.004   |
| Cedar Creek      | Weighted Unifrac   | 8                                   | 0.185 | 0.0078  |



**Table S9:** 16S community similarity measurements, calculated across all soils, Cedar Creek (grassland) soils, and Kellogg Biological Station (agricultural) soils. Soils considered were those used in Procrustes and Mantel analyses. By all metrics used, Kellogg Biological Station soils showed less community variability.

| <b>16S rRNA Gene Community Similarity</b> |                               |                                      |                                    |
|-------------------------------------------|-------------------------------|--------------------------------------|------------------------------------|
| <b>Soils Considered</b>                   | <b>Bray-Curtis Similarity</b> | <b>Unweighted Unifrac Similarity</b> | <b>Weighted Unifrac Similarity</b> |
| <b>All</b>                                | 0.327                         | 0.303                                | 0.748                              |
| <b>Cedar Creek</b>                        | 0.335                         | 0.315                                | 0.740                              |
| <b>Kellogg Biological Station</b>         | 0.446                         | 0.343                                | 0.825                              |
